# Supplementary material for: Isolation of Recombinant Phage Antibodies Targeting the Hemagglutinin Cleavage Site of Highly Pathogenic Avian Influenza Virus
Source: PubMed Central journal article supplement (PMC3618430; doi:10.1371/journal.pone.0061158), 2013-04-05
Supplement: pone.0061158.s001.pdf [file pone.0061158.s001.pdf]

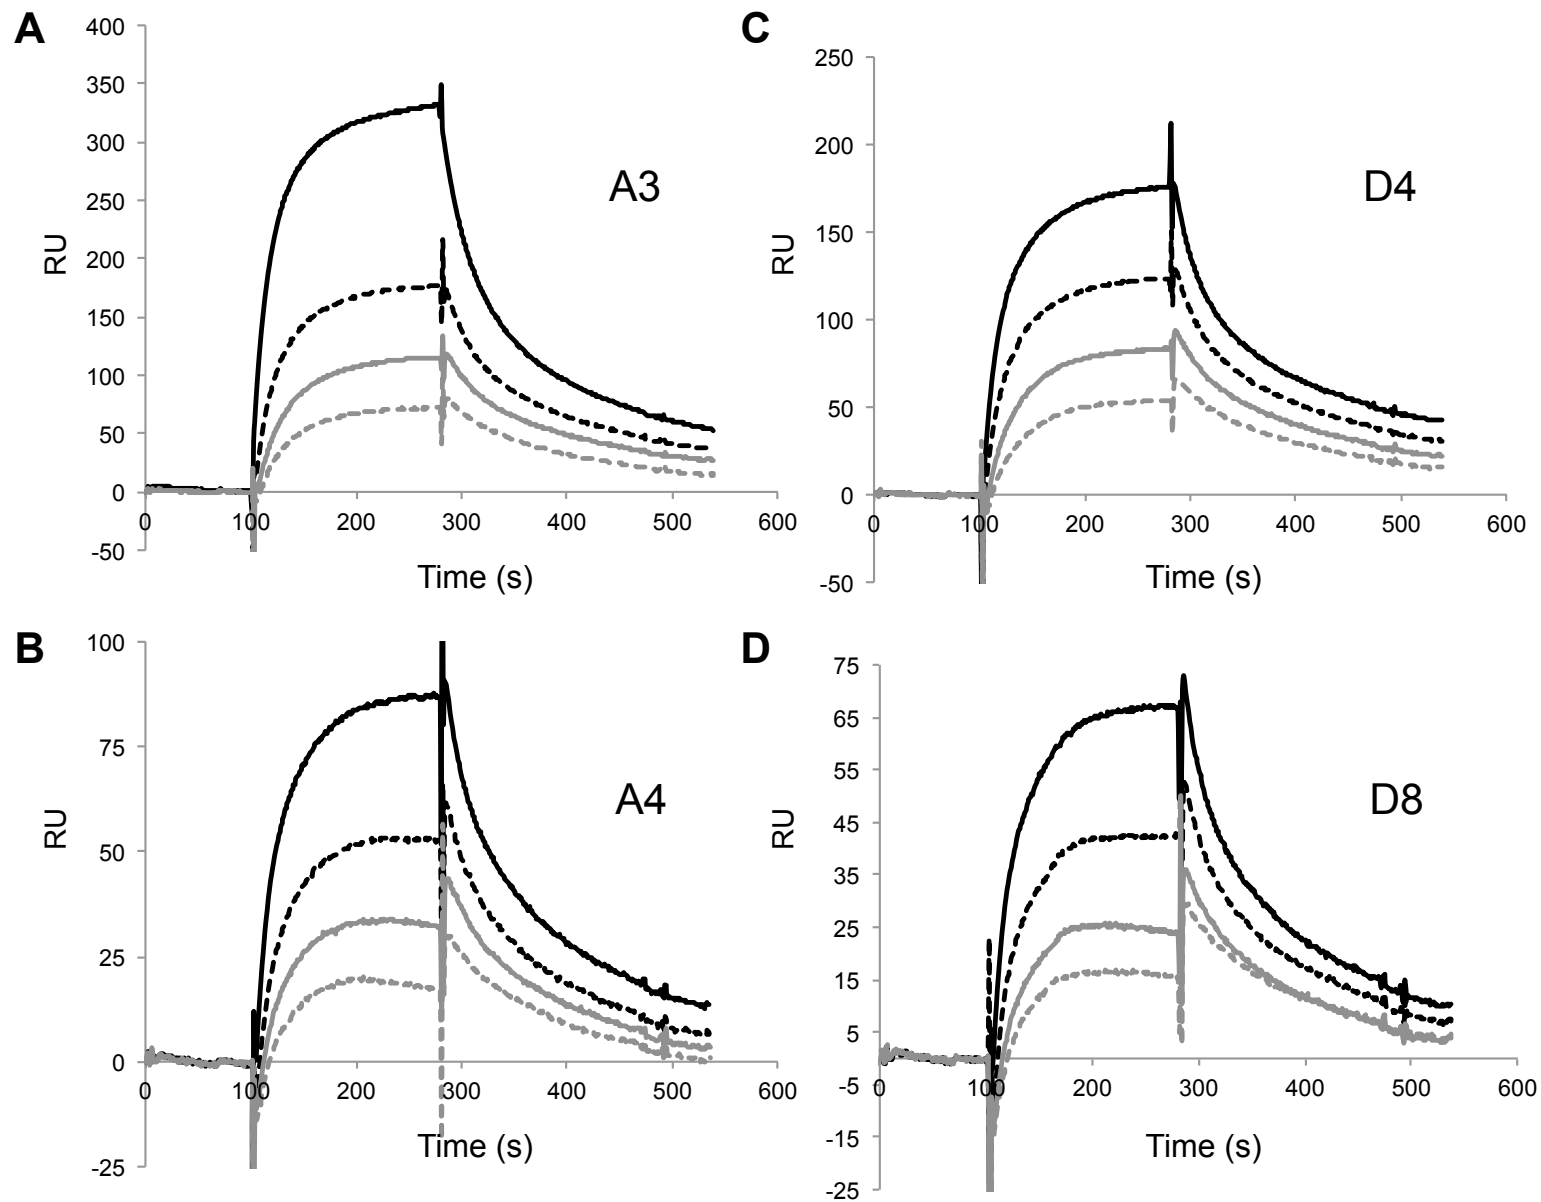

**Figure S1.** SPR sensorgrams obtained for purified Fab fragments bound to H5N1 HA protein. The lines are the same as those in Figure 4. H5N1 HA: recombinant A/Vietnam/1194/2004 H5N1 HA.
