# Supplementary material for: Isolation of Recombinant Phage Antibodies Targeting the Hemagglutinin Cleavage Site of Highly Pathogenic Avian Influenza Virus
Source: PubMed Central journal article supplement (PMC3618430; doi:10.1371/journal.pone.0061158), 2013-04-05
Supplement: pone.0061158.s002.pdf [file pone.0061158.s002.pdf]

A3-VL 1 DIVLTQSE**ASLAV**SPGQRATIF**CKASQSVVYD**--**GDSYMN**WYQQKPGQPPKLLIY**AASNLES**GI PARFSGSGSGTDFTLNI 80  
A4-VL 1 DIVLTQSE**ASLAMS**LGQRATIS**CKASQSVVYD**--**GDSYMN**WYQQKPGQPPKLLIY**AASNLES**GI PARFSGSGSGTDFTLNI 80  
D4-VL 1 DIVLTQSE**GSLSV**SLGQRATIS**CKASQSVDYD**--**GDSYMN**WYQQKPGQPPKLLIY**AASNLES**GI PARFSGSGSGTDFTLNI 80  
D8-VL 1 DIVLTQSE**ASLAMS**LGQRATIS**CKASQSVVYD**--**GDSYMN**WYQQKPGQPPKLLIY**AASNLES**GI PARFSGSGSGTDFTLNI 80

A3-VL 81 HPVEEEDAATYYC**QOSSE**--**DPWTF**GGG**TKLEIKRA** 117  
A4-VL 81 HPVEEEDAATYYC**QOSSE**--**DPWTF**GGG**TKLEIKRA** 117  
D4-VL 81 HPVEEEDAATYYC**QOSSE**--**DPWTF**GGG**TKLEIKRA** 117  
D8-VL 81 HPVEEEDAATYYC**QOSSE**--**DPWTF**GGG**TKLEIKRA** 117

A3-VH 1 QVTLKESGPGILKPSQTL**SLTCSFSGFSLSTSGMGVGV**WIRQ**PSGKGLEWLANI**WDD---**DKY**YNPSLKS**QLTISKDTS**RNQV 83  
A4-VH 1 QVTLKESGPGILKPSQTL**SLTCSFSGFSLSTSGMGVGV**WIRQ**PSGKGLEWLANI**WDD---**DKY**YNPSLKS**QLTISKDTS**RNQV 83  
D4-VH 1 QVTLKESGPGILKPSQTL**SLTCSFSGFSLNITSGMGVGV**WIRQ**PSGKGLEWLANI**WDD---**DKY**YNPSLKS**HLTISKDTS**GNQV 83  
D8-VH 1 QVTLKESGPGILKPSQTL**SLTCSFSGFSLSTSGMGVGV**WIRQ**PSGKGLEWLANI**WDD---**DKY**YNPSLKS**QLTISKDTS**RNQV 83

A3-VH 84 FLKITSVDT**ADTATYYCARRGEYDA**-----**MDY**WGQGS**SVTVSS** 132  
A4-VH 84 FLKITSVDT**ADTATYYCARRGKYDS**-----**MDY**WGQGS**SVTVSS** 132  
D4-VH 84 FLKITSVDT**ADSATYYCARRGDYDS**-----**LDY**WGQGS**SVTVSS** 132  
D8-VH 84 FLKITSVDT**ADTATYYCARRGNYDA**-----**MDY**WGQGS**SVTVSS** 132

**Figure S2.** Amino acid sequences of the four positive clones. Complementarity determining regions (CDRs) are shown in bold, and the non-identical positions are boxed.
